# Supplementary material for: Core outcome measures for interventions to prevent or slow the progress of dementia for people living with mild to moderate dementia: Systematic review and consensus recommendations
Source: PubMed Central journal article supplement (PMC5491018; doi:10.1371/journal.pone.0179521), 2017-06-29



**Development of a consensus standardised 'Core' Outcome Data set for disease modification in clinical trials for mild to moderate dementia (COD Dementia)**




**Gill Livingston**



## Quick recap

- Why
- Who
- How
- Purpose of today
- Publications plan



August, 2014

## Why?



- Research knowledge and funding on dementia lags behind other major diseases such as cancer or heart disease
- No disease modification treatment
- NHS has 100000 people diagnosed/annum
- Huge potential to research effectively
- Trials developed without liaison and with results not comparable or meta-analysable
- This project is to generate evidence based, consensus so that easier to get funding and results.



## Who? The community

We invited **everyone** HTA invited and some they had left out

- Gill Livingston (CI) with Rob Howard leading
- Charlotte Roberts, Jenny McCleery, Louise Lafortune and Gail Mountain as co-applicants contributing relevant work their groups had done
- James Pickett from Alzheimer's Society leading PPI
- The researchers:
  - Lucy Webster Research assistant
  - Derek Groskreutz (volunteer UCL/Yale masters student )
  - Anna Grinbergs- Saull (AS)



- 
- Occupational therapy - Gail Mountain (co-applicant)
  - Measurement Group- Jenny McCleery (co-applicant)
  - Dementia care - Frances Bunn, Claire Goodman
  - Dementia pharmacist - Ian Maidment
  - Health service research - Sasha Shepperd
  - Health Outcome Measurement - Sallie Lamb, Charlotte Roberts (co-applicant),
  - Neurology - Peter Garrard
  - Old age medicine - Patrick Kehoe, Roy Jones, Peter Passmore, John Young
  - Old age psychiatry - Clive Ballard, Sube Banerjee, Alistair Burns, Chris Fox, Clive Holmes, Rob Howard(co-applicant), Gill Livingston (PI), John O'Brien, Robert Perneczky
  - Palliative medicine - Fliss Murtagh
  - Primary care dementia research - Louise Robinson
  - Psychology and dementia - Linda Clare, Georgina Charlesworth, Murna Downs, Esme Moniz- Cooke, Bob Woods
  - Public Health and ageing - Carol Brayne , Louise Lafortune(co-applicant)
  - Scale measurement -Orlaith Burke
  - Social care and social policy - David Challinor, Katie Eastherstone, Justine Schneider, Claire Surr



## How: Very rapidly. No mission creep.

Work package 1 Use of current knowledge

**Jenny McCleery** Cochrane register

**Charlotte Roberts** - International Consortium for Health Outcomes Measurement (ICHOM) Dementia Working Group what matters for patients

**Louise Lafortune** – AS systematic review of non-pharmacological outcomes in dementia

**Gail Mountain** (Esme Moniz- Cooke) JPND psychosocial measures



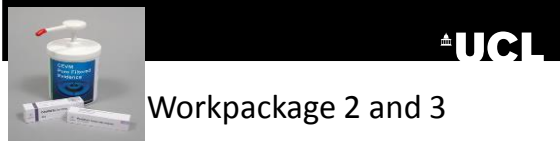

## Workpackage 2 and 3

**WP 2** – systematic review + literature from WPI  
 Identify relevant trials on disease modification (search tweaked from application)  
 Extract, tabulate and count the use of each measure  
 Find validation data

### Workpackage 3

An assessment of the importance of the 'proposed' core outcome measures to patients and carers  
 Three groups: Sheffield, London, Cambridge

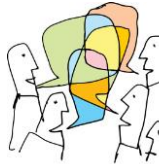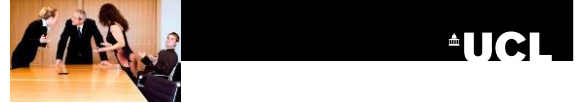

## Today- workpackage 4

Consensus conference

August, 2014

## Information

- Lucy – systematic review
- Anna – focus groups
- Champions summarising their areas in review.
  - Is it core?
  - Proposing outcome measures and explaining why
  - Discussion in between
- Rob- cognition
- John- neuroimaging
- Robert – CSF and blood tests
- Gail ADL
- Gill- neuropsychiatric
- Sube – QOL
- Bob- global

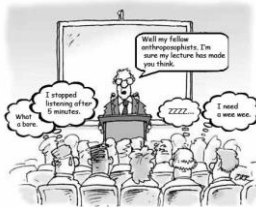

Measures for use in all NIHR applications for trials disease modification in mild to moderate dementia

What is core?  
 What measures should we use?  
 ... and why?  
 Transparency  
 Putting it all together

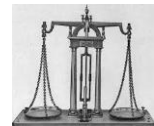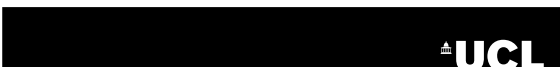

## What next

HTA publication- second week of June  
 Submission to Lancet Neurology  
 Gill and Lucy will write (plus any volunteers)  
 Use words from champions  
 We will circulate

Next step after  
 ?Work with others including ARUK - with regulators and pharmaceutical industry  
 ? Widen remit  
 Thanks for attention

## COD Dementia: Systematic Review

Lucy Webster

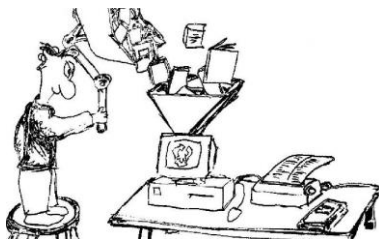

## Purpose

- A "brief" systematic review to see what outcome measures are used across previous disease modification trials
- We defined a disease modifying treatment as one that is *"trying to change the underlying pathology of the disease of dementia"*

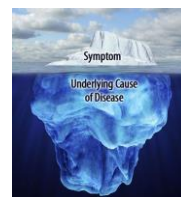

## Search terms

- Adapted from search strategy in application
- Also adapted dependent on database e.g. more basic search on trial registers

Dementia related search terms AND Outcome related search terms AND Intervention OR therap\* OR trial\* AND Control\*

- Limited searches to English when possible

## Searches

### Workstream 1:

- ALOIS
- References from Louise La Fortune's project

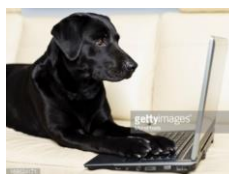

### Workstream 2:

- Cochrane central register of controlled trials
- Medline
- PsycInfo
- Embase
- Lilacs
- CINAHL
- ISRCTN
- Clinicaltrials.gov
- Hand searching of relevant systematic reviews in the database

Altogether: 37787 references

## Screening titles and abstracts

22,918 abstracts with duplicates removed

- Derek and I screened first 20 to check for consistency
- We were looking for trials that appeared that they could be about disease modifying treatments in mild to moderate dementia from the abstracts
- From screening we wanted to look at **897 full texts**

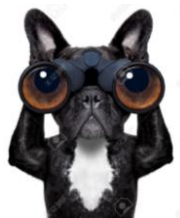

## Screening full texts

- A, D and L screened first 10 independently, compared answers and discussed, then same process with next 10.

### Inclusion criteria:

- Paper in English
- Peer reviewed journal article or ongoing trial
- Mild or moderate dementia
- Disease modification trials
- Randomised controlled trial or Clinical controlled trial
- At least 1 Quantitative outcome

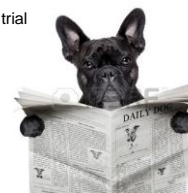

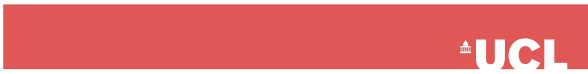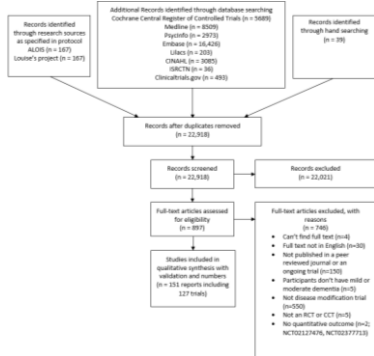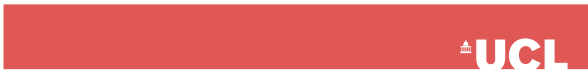

Full texts excluded

- 746 Full-text articles excluded:
- 4 can't find full text
  - Full text not in English
  - Not published in a peer reviewed journal or an ongoing trial
  - No participants with mild or moderate dementia
  - Not a disease modification trial
  - Not an RCT or CCT
  - No quantitative outcome

Included 127 trials (from 151 reports)

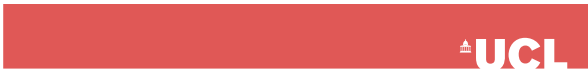

Data extraction

Data extracted from first 5 trials independently by D and L and compared.

Also used to test extraction spreadsheet.

- Extracted data about:
- Location, dementia type & severity, how dementia diagnosis made.
  - Participants sex & age
  - Intervention
  - Control group
  - Which outcomes primary or secondary and when measured

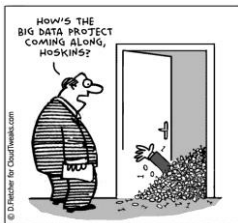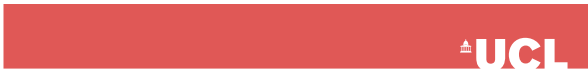

Measures

- Divided measures cross 6 domains: Cognition, Activities of daily living, quality of life, global, behavioural, and biological markers.
- Overall 80 outcome measures:
  - 71 different questionnaire/interview measures
  - 9 biological techniques used e.g. MRI, EEG, blood
- Recorded frequency of use and with how many participants

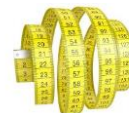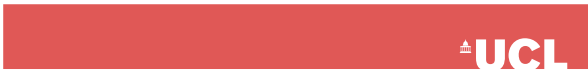

Validation of measures

- Basic validation as very limited time!
- Looking for information that is available
- Who the measure is valid for use with and languages its available in
- Sensitivity to change in treatment studies
- Reliability
- Acceptability
- Floor and ceiling effects
- Minimal clinically important difference

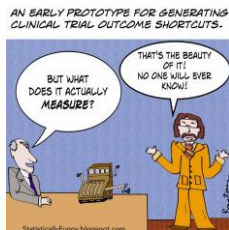

## Core Outcomes for Dementia Patient & Public Involvement

*Anna Grinbergs-Saull*  
Research Engagement Officer  
Alzheimer's Society

## Patient & Public Involvement (PPI)

|               |                                               |
|---------------|-----------------------------------------------|
| Focus Group 1 | ADL, Behaviour, Cognition, Quality of Life    |
| Focus Group 2 | global measures, outcome measure packages     |
| Focus Group 3 | biomarkers, imaging, outcome measure packages |

- **12 Volunteers**
  - 3 People with Dementia
  - 2 Carers
  - 6 Former Carers
  - 1 PPIE group member
- **Wide range of backgrounds**
  - Alzheimer's, FTD, Vascular Dementia, PCA
  - Trial participants
  - People without research experience

## What should be Core?

- **Broad Support for each domain**
- **Package: Biomarkers, cognition, behavioural, (global?)**
- **Impact of context and environment**

## Recommendations: Cognition

### Positives

- Measures key signs of progression
- ADAS-Cog has good amount of detail

### Negatives

- Strong reaction against MMSE – irrelevant/restricted
- Memory tests seen as demoralising

*"watching someone fail a test"*

- Memory not always a symptom

## Recommendations: Biomarkers

### Positives

- Most objective and reliable measure
- Tangible contribution
- CSF strongly supported
- Blood tests common-place and unproblematic
- Imaging generally accepted as feasible

### Negatives

- MRI and PET not feasible in vascular dementia
- Travel and location

## Recommendations: Behavioural

### Positives

- Often significant aspect of dementia
- More sensitive than e.g. ADL

### Negatives

- Not sensitive enough in isolation
- Less applicable in mild-moderate dementia
- Lacks detail – reason behind changes
- Missing important behaviours e.g. change in tastes

## Recommendations: Activities of Daily Living

### Positives

- PwD: gives an accurate, practical account
- IADL more relevant
- Less distressing than cognition

### Negatives

- Katz/ yes-no scales lack detail
- Restricted to certain activities and environments
- Assistance not always from carer

*"I wont remember to take my medication without my alarm going off.. I can remember with the help of other things"*

- Requires recall
- Resembles benefits questions

## Recommendations: Quality of Life

### Positives

- Could be core – important to assess
- DEM-QOL is comprehensive and easy to use
- EQ-5D thermometer is "all-encompassing"

### Negatives

- Assessing someone else's QoL
- Relies on accurate interpretation of responses
- EQ-5D & QoL-AD lack detail
- Does not account for personality

## Recommendations: Global

### Positives

- Could be core
- Broad measure – gives holistic account

### Negatives

- Shouldn't be core – too superficial
- Depends on individual's experience on the day
- Larger package would give detailed holistic view

## Recommendations & Priorities

- Involving people without defined carer
- Time: long meeting vs. long day
- Travel is significant barrier
- Relevance of measures
- Sense of purpose and contribution are vital

## Summary

- Core Package: Biological, cognition and behaviour
- More weight on Biomarkers
- Cognitive tests have greater impact on individual
- Prioritise usefulness of the measure
- Consider impact beyond physical risk (e.g. travel/ relevance)
- Different dementias, different measures?

## Cognition outcome measures for disease modifying trials in AD

Robert Howard, UCL

### The Alzheimer's Disease Assessment Scale – Cognitive Subscale (ADAS-Cog) and the Mini-Mental State Examination (MMSE)

#### ADAS-Cog

91 trials 20,005 participants  
45 minutes  
Special training  
Scored out of 70  
Can be augmented with Delayed Word Recall, Maze Task, Digit Cancellation and subjective judgement of concentration and distractability

#### MMSE

66 trials 17,237 participants  
10 minutes  
Widely clinically used  
Scored out of 30

### The Alzheimer's Disease Assessment Scale – Cognitive Subscale (ADAS-Cog) and the Mini-Mental State Examination (MMSE)

Both poor at distinguishing early AD/MCI from health  
Both relatively insensitive to change in very mild AD

But both demonstrated excellence in detection of treatment effects in cholinesterase inhibitor and memantine trials

Both have published minimum clinically important differences (1.4 MMSE points probably means more to clinicians than 3 ADAS-Cog points)

If trials can be designed to anticipate differences of this magnitude, either scale could be used

### Neuropsychological Test Battery (NTB)

7 trials 3180 participants (Cog State 161 participants, CERAD 80)

Developed because of floor/ceiling effects with cognitive measures

9 measures of cognitive performance, chosen to assess delayed verbal recall and executive functioning:

Wechsler Memory Scale - visual immediate  
Wechsler Memory Scale - verbal immediate  
Rey Auditory Verbal Learning Test - immediate  
Wechsler Memory Scale - digit span  
Controlled Word Association Test  
Category Fluency Test  
Wechsler Memory Scale - visual delayed  
Wechsler Memory Scale - verbal delayed  
Rey Auditory Verbal Learning Test - delayed

Probably most useful in short trials where proof of concept/signal needed quickly but clinical significance less important

## Conclusions

Both ADAS-Cog and MMSE have utility

Choice will depend on available resources, including who is available to conduct assessments

Little evidence that ADAS-Cog superior in detection of treatment effects when present

For short trials, where detection of some kind of signal is the priority, NTB may have a place

## Activities of daily living measures

Gail Mountain  
Professor of Health Services Research

## What are activities of daily living measures?

- ADL measures: basic every day activities that we all have to do e.g. washing, bathing, dressing
- IADL measures: other activities that are necessary and important for daily living e.g. cooking, shopping, money management

Some newer measures include other activities of daily life such as recreation

## Why are they used for studies of disease modifying interventions?

To determine whether a person is able to undertake such activities; whether there has been any change in ability as a result of the intervention

Should this be core?

## What measures have we got?

12 were initially identified and 9 then shortlisted for consideration

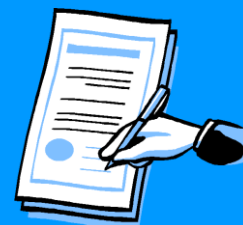

## How to identify the best?

- The number of studies where the measure has been used
- The number of participants the measure has been used with
- How good each measure is considered to be based on a number of criteria
- Appropriateness of the items it includes

## Quality criteria from the evidence

Developed for use with people with dementia/ has been used with this population

Demonstrated psychometric properties such as;

- Two people can obtain the same result from using it with the same person
- It makes sense to those using it
- It can detect change



## What did our PPI group tell us

- Importance of self completion
- Keep it simple
- Difficulty with recall

## What does this leave us with?

- (1) The Alzheimer's disease cooperative ADL measure; ACDS-ADL
- (2) Disability in Dementia measure: DAD
- (3) Lawton ADL/ PSMS
- (4) Bristol ADL measure: BADLs

## The shortlist

| Measure         | Population intended for                         | Method of completion                                          |
|-----------------|-------------------------------------------------|---------------------------------------------------------------|
| ACDS-ADL        | Early/ moderate dementia                        | Carer interview                                               |
| DAD             | Community living                                | Carer interview or by task observation                        |
| Lawton ADL/PSMS | All stages of dementia when used in combination | By interview with the person with dementia or carer interview |
| Bristol ADL     | Early/ moderate dementia                        | Carer interview                                               |

## Recommendations

- The DAD is the most often used for community living people and has an observation option
- The Lawton ADL/ PSMS is the only measure that includes self completion and is appropriate for those with later stage dementia

## What challenges remain?

- Carer report versus hearing the voice of the person with dementia
- Methods to capture information; one measure identified used video which is good but impractical

THANK YOU

[g.a.mountain@sheffield.ac.uk](mailto:g.a.mountain@sheffield.ac.uk)

## COD dementia: fluid biomarkers

Robert Perneczky  
Imperial College London  
School of Public Health

### Why development of therapies for dementia fails

- ~2000 registered trials and 900 products in the past 20 years
- Low number of early phase drugs (3.8% vs 31% in cancer)
- 197 products in "active" development
- 216 products suspended or discontinued
- Common reasons: lack of efficacy or safety concerns
- 74% did not report reason for discontinuation
- 3/13 companies were able to provide a reason for discontinuation

Gauthier S et al. (2016) *Alzheimers Dement*, 12, 60-64

### Definition of a biomarker

- A characteristic that is objectively measured and evaluated as an indicator of normal biologic processes, pathogenic processes or biological responses to a therapeutic intervention
- Any measurable characteristic that is not a clinical assessment
- Clinical measures are those measures that intrinsically are not fully objective

Biomarkers Definitions Working Group (2001) *Clinical Pharmacology and Therapeutics*, 69, 89-95

### Types of biomarkers

- Prognostic biomarkers
- Predictive biomarkers
- Pharmacodynamic (theragnostic) biomarkers
- Surrogate endpoints

<http://www.fda.gov/downloads/Drugs/GuidanceComplianceRegulatoryInformation/Guidances/UCM230597.pdf>

### Prognostic biomarkers

- Indicates future clinical course with respect to a defined outcome, in the absence of a specific therapeutic intervention (natural course)
- No relationship to any particular new therapy
- Application of a new therapy may invalidate the pre-therapy inference (marker-clinical association may change with therapy)

<http://www.fda.gov/downloads/Drugs/GuidanceComplianceRegulatoryInformation/Guidances/UCM230597.pdf>

### Predictive biomarkers

- Measured prior to an intervention
- Identification of individuals susceptible to a drug effect
- Developed for specific therapeutic interventions
- Not necessarily prognostic of post-therapy clinical course

<http://www.fda.gov/downloads/Drugs/GuidanceComplianceRegulatoryInformation/Guidances/UCM230597.pdf>

### Prognostic vs predictive biomarkers

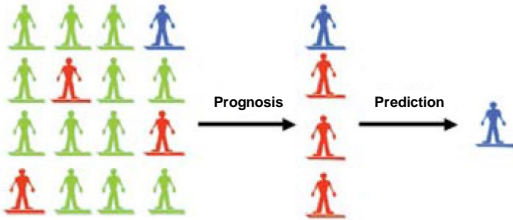

### Pharmacodynamic biomarkers

- Indicate therapy response
- Reveal occurrence or magnitude of biological response
- Developed for specific therapeutic interventions
- May or may not be therapy-specific

<http://www.fda.gov/downloads/Drugs/GuidanceComplianceRegulatoryInformation/Guidances/UCM230597.pdf>

### Surrogate endpoints

- Subset of pharmacodynamics biomarkers
- Substitute for a clinical endpoint
- Expected to indicate clinical benefit
- Reflects how a study participant feels, functions or survives

<http://www.fda.gov/downloads/Drugs/GuidanceComplianceRegulatoryInformation/Guidances/UCM230597.pdf>

### Surrogate endpoints

- Subset of pharmacodynamics biomarkers
- Substitute for a clinical endpoint
- Expected to indicate clinical benefit
- Reflects how a study participant feels, functions or survives

<http://www.fda.gov/downloads/Drugs/GuidanceComplianceRegulatoryInformation/Guidances/UCM230597.pdf>

### CSF biomarkers: overview

- Biomarker signature reflecting neuropathological hallmarks of AD
- A $\beta$ 42  $\downarrow$  (long before onset of clinical symptoms)
- tTau  $\uparrow$  (subsequent to A $\beta$ 42 decrease)
- pTau181  $\uparrow$  (more specific to AD)
- Other amyloid cascade markers for specific purposes (e.g. sAPP $\beta$ )
- Used in trials to measure target engagement, sample enrichment, secondary outcomes
- CSF field less advanced for other dementias
- EMA endorses use of CSF markers to enrich MCI populations (high sensitivity and moderate specificity)
- FDA supports use of CSF markers in combination with clinical outcomes in pre-dementia populations

### CSF biomarkers as surrogate endpoints in AD trials

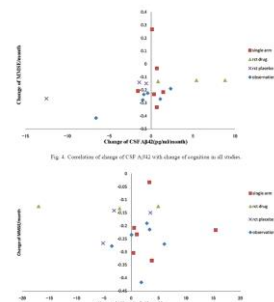

Zhou S et al. (2009) J Alzheimers Dis, 18, 89-102

- ????

## Why global?

### Domain: Global Functioning

Presenter: Bob Woods

- Reflects the nature of the condition
- Combines multiple domains
- (Potentially) combines multiple perspectives (but ? perspective of the person with dementia? )

### Measures identified from review

1. Alzheimer's Disease Cooperative Study - Clinical Global Impression of Change
2. Blessed Dementia Rating Scale
3. Clinical Dementia Rating Scale
4. Clinical Global Impressions Scale
5. Clinician's Interview-Based Impression of Change Plus Caregiver Input
6. Dementia Severity Rating Scale
7. Global Deterioration Scale
8. Gottfries-Brane-Steen rating scale for dementia
9. Sandoz Clinical Assessment-Geriatric Scale

### Number of trials using each global outcome

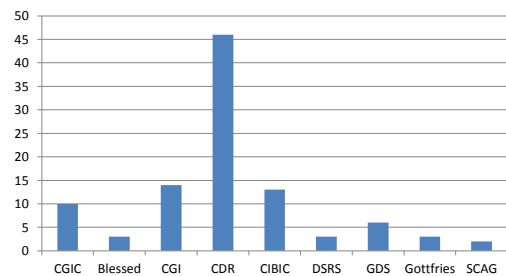

### Types of global scales

- Staging of dementia
  - CDR (nb 'sum of boxes' widely used in treatment trials)
  - GDS
- Multiple domain rating
  - DSRS
  - SCAG
  - Blessed Dementia Rating Scale
  - Gottfries-Brane-Steen rating scale for dementia
- 'Impression' – rating change
  - CGI
  - ADCS-CGIC
  - CIBIC Plus

### Multiple domain rating scales

- **Dementia Severity Rating Scale**
  - 12 domains, rated by carer
  - Memory; speech and language; ability to make decisions; social & community activity; home activities & responsibilities; rating; control of urination & bowels; personal care & cleanliness; orientation to time and place.
- **Sandoz CAG**
  - 19 domains (5 factors), rated on interview and observation
  - Confusion; mental alertness; self-care; anxiety; hostility; bothersome; irritability; unsociability; fatigue
- **Blessed Dementia Rating Scale**
  - 22 items – often used with Blessed Dementia Information Memory Concentration Test
  - Everyday activities (8 items); ADL – eating, dressing, toilet (3 items); personality changes (11 items)
- **Gottfries-Brane-Steen rating scale for dementia**
  - based on a semi-structured interview and observation of the patient
  - subscales measuring intellectual (12 items), emotional (3 items) activities of daily living (primarily items of self-care) (6 items); behavioural and psychological symptoms of dementia (6 items)

## Impression scales - CBIC

- Semi-structured interview, with person with dementia and caregiver
- Four major categories divided into domains
- Probes suggested for each domain, but interviewer may use additional probes
- After completing interview, consult all available information, including MMSE / ADAS-Cog (from that visit)
- Detailed notes on each domain to inform follow-up assessments

| General                  | Mental/Cognitive State                                                                        | Behaviour                                                                                                                 | Activities of Daily Living                  |
|--------------------------|-----------------------------------------------------------------------------------------------|---------------------------------------------------------------------------------------------------------------------------|---------------------------------------------|
| Relevant History         | Arousal / Alertness / Attention / Concentration                                               | Thought Content                                                                                                           | Basic and Complex (instrumental activities) |
| Observation / Evaluation | Orientation<br>Memory<br>Language / Speech<br>Praxis<br>Judgement / Problem Solving / Insight | Hallucinations / Delusions / Illusions<br><br>Behaviour / Mood<br>Sleep / Appetite<br>Neurological / Psychomotor Activity | Social Function                             |

### THREE – SIX MONTH VISIT

#### Subject's Interview – Clinical Impression of Change:

- Very Much Improved
- Much Improved
- Minimally Improved
- No change
- Minimal worsening
- Moderate worsening
- Marked worsening

#### Informant's Interview – Clinical Impression of Change:

- Very Much Improved
- Much Improved
- Minimally Improved
- No change
- Minimal worsening
- Moderate worsening
- Marked worsening

#### Overall Score – Clinical Impression of Change:

- Very Much Improved
- Much Improved
- Minimally Improved
- No change
- Minimal worsening
- Moderate worsening
- Marked worsening

## Clinician's Interview Based Impression of Change – CIBIC Plus

### Sensitivity to change (selected measures)

- CDR sensitive to treatment effects in 13 studies
- GDS sensitive to change in 2 studies, but not in a third
- CIBIC and CGIC both sensitive to change in 1 study

## Clinician's Interview Based Impression of Severity (CIBIS) (baseline assessment)

### SEVERITY OF ILLNESS

Considering your total clinical experience with this particular population, how mentally ill is this patient now?

- |                             |                                           |
|-----------------------------|-------------------------------------------|
| 0 = Not assessed            | 4 = Moderately ill                        |
| 1 = Normal, not at all ill  | 5 = Markedly ill                          |
| 2 = Borderline mentally ill | 6 = Severely ill                          |
| 3 = Mildly ill              | 7 = Among the most extremely ill patients |

SCORE

### Inter-rater reliability (selected measures)

- Good to very good across 12 studies for CDR
- Good across 4 studies for GDS
- ? No information for CIBIC or CGIC, but good test re-test reliability claimed for both in one study

### Recommendation

- IF CIBIC shown to have good inter-rater reliability, the notion of individualising the trajectory of change is worth considering
- Multiple domain rating scales risk not having a rationale for weighting of the various domains – DSRS good content, but note caregiver rating
- Staging scales should be ideal for evaluating disease modifying treatments
  - CDR is widely used and has good reports relating to reliability and sensitivity to change – but if sum of boxes is used, is it any different from a multiple domain scale?
  - Both CDR and CDR-SB do have good discriminant validity (Rikkert et al., 2011)
  - GDS not so widely used, but potentially useful (? With FAST – Functional Assessment Staging)

## Biomarkers: Imaging

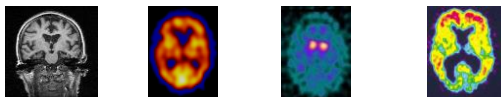

John O'Brien  
Professor of Old Age Psychiatry  
University of Cambridge

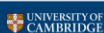

## Use of imaging in trials of disease modification in AD

- To ensure subject meets diagnostic criteria for AD
- To stratify subject for therapy under study (e.g. amyloid positive, tau positive, WML changes)
- To ensure other inclusion criteria met (e.g. no microbleeds)
- As a safety outcome measure
- To show target engagement (e.g. does amyloid lower)
- As outcome measure in its own right

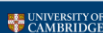

## Imaging modalities used in clinical trials

- Computed tomography (CT) - **only really used as inclusion/ exclusion criteria for entry**
- Structural Magnetic resonance imaging (MRI)
- Perfusion (HMPAO) SPECT/ Metabolic (FDG) PET
- Amyloid (PIB, florbetapir, flutemetamol, flurbetaben) PET
- Tau (AV1451, PBB3, THK) PET
- Other: EEG, Transcranial doppler, MR Spectroscopy

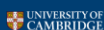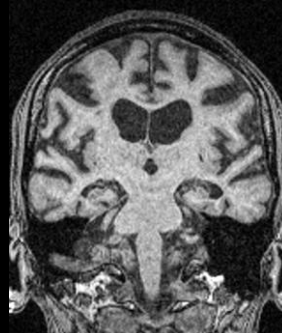

Baseline

Fox and Freeborough, 1996

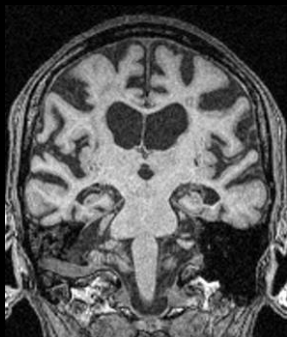

Year 1

Fox and Freeborough, 1996

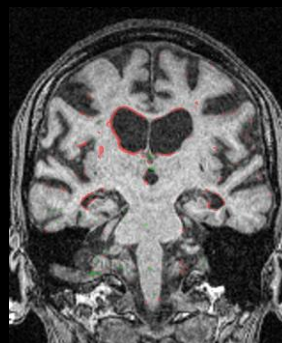

2.3% volume loss  
over 12 months

Difference

Fox and Freeborough, 1996

## Serial MR Imaging in AD and DLB

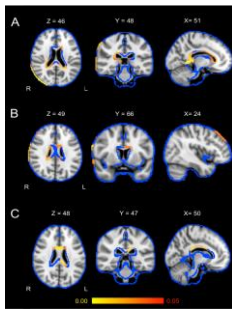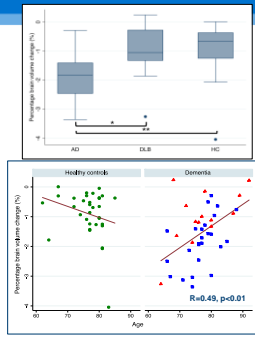

UNIVERSITY OF CAMBRIDGE

Mak et al, Neuroimage Clinical, 2015

## FDG PET significantly superior to Perfusion SPECT. Direct comparison in 100 subjects

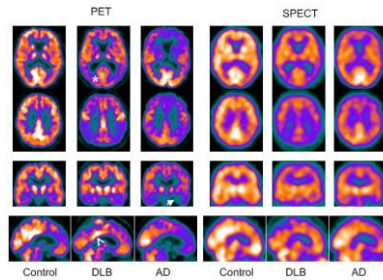

Diagnostic accuracy PET 20% higher than SPECT (93% v 72%)

PET had 5X more significant voxels compared to SPECT (40% v 7%, p<0.0001)

UNIVERSITY OF CAMBRIDGE

O'Brien et al, Journal of Nuclear Medicine (2014)

## Amyloid PET imaging

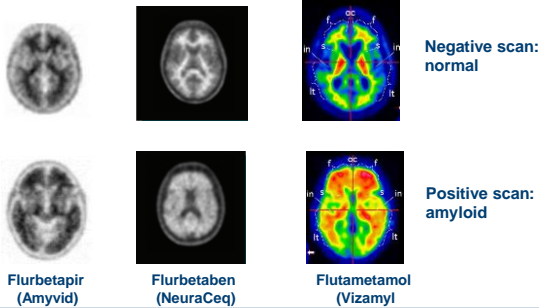

UNIVERSITY OF CAMBRIDGE

## Amyloid imaging in Dementia

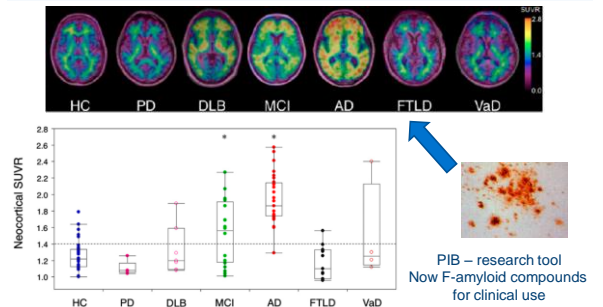

UNIVERSITY OF CAMBRIDGE

Villemagne et al, 2011

## Tau PET imaging in Dementia (AV1451)

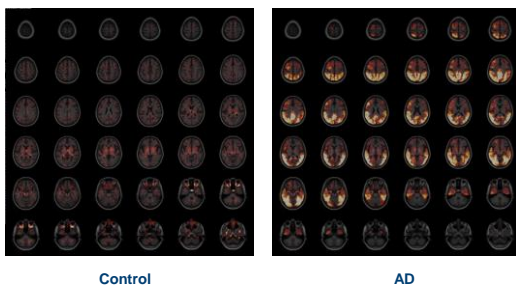

UNIVERSITY OF CAMBRIDGE

## COD: Literature review

• 129 papers identified of which 41 studies (32%) had imaging biomarkers as outcome measures; increase over time (26% of published studies v 54% ongoing protocols, Chi Sq p=0.056)

- Serial structural MRI 30
- FDG PET 13
- Amyloid PET 10
- EEG 3 (but 1 in VaD and 1 ongoing)
- MR spectroscopy 1 (but results not reported)
- Perfusion SPECT 1
- Transcranial doppler 1
- Tau PET 1 (ongoing)

NB some studies included more than one biomarker

UNIVERSITY OF CAMBRIDGE



## Summary of MR studies

- Whole brain and hippocampal volume change mostly used
- Changes demonstrated over periods 26 to 80 weeks
- Usually similar between groups **but**
- Fox (2005, AN1792): greater atrophy in treated group
- Salloway (2009, ph2 Bapi): greater atrophy in treated group
- Li (2015, CH herb): decrease only in placebo group
- Salloway (2011, ELND005): greater atrophy in treated group
- Turner (2015, resveratrol): greater atrophy in treated group
- Winblad (2012, CAD106): treatment group declined less

## Effects of Aβ immunization (AN1792) on MRI measures of cerebral volume in Alzheimer disease

N.C. Fox, MD, FRCP; R.S. Black, MD; S. Gilman, MD, FRCP; M.N. Rossor, MD, FRCP; S.G. Griffith, MD, PhD, MRCP; L. Jenkins, PhD; and M. Koller, MD, MPH, for the AN1792-QS-21-301 Study Team\*

| Measure                                       | Group              | Mean Change (SD) | 95% CI               | P-value |
|-----------------------------------------------|--------------------|------------------|----------------------|---------|
| Whole-brain volume boundary shift integral, % | Placebo            | 1.04 (1.74)      |                      |         |
|                                               | Antibody responder | 1.12 (1.86)      |                      |         |
| Ventricular volume boundary shift integral, % | Placebo            | 0.48 (0.40)      |                      |         |
|                                               | Antibody responder | 1.10 (0.75)      | -0.61 (-0.84, -0.39) | <0.001  |
| Hippocampal volume, %                         | Placebo            | -2.86 (3.19)     |                      |         |
|                                               | Antibody responder | -3.78 (2.63)     | 0.93 (-0.26, 2.12)   | 0.124   |

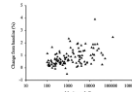

50% greater volume loss in immunised subjects.  
Sig correlation with immune response

## A randomized, double-blind, placebo-controlled trial of resveratrol for Alzheimer disease

OPEN

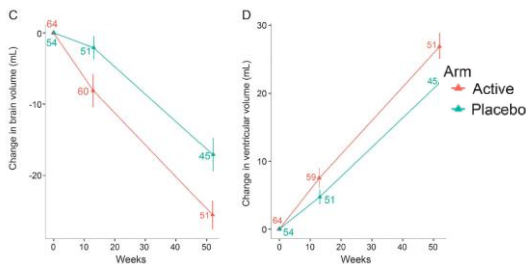

## Summary of FDG studies

- Whole brain and ROI analysis used
- Changes demonstrated over periods 26 to 80 weeks
- Usually similar between groups **but**
- Kadit (2008, phenserine): increase in treatment group
- Dodel (2013, iv IG): greater change in placebo group
- Wang (2013, memantine): treatment group declined less

## Effects of Memantine on Clinical Ratings, Fluorodeoxyglucose Positron Emission Tomography Measurements, and Cerebrospinal Fluid Assays in Patients With Moderate to Severe Alzheimer Dementia

A 24-Week, Randomized, Clinical Trial

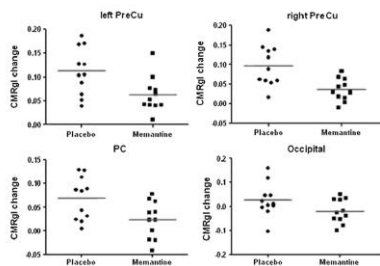

FIGURE 2. Twenty-four-week CMRgl changes in anatomical ROIs known to be preferentially affected by AD.

## Summary of Amyloid studies

- Whole brain SUVR usually used
- PIB and Flortetapir most widely used ligands
- Changes not always demonstrated over time
- Usually similar between groups **but**
- Ostrowitzki (2012, gantenerumab): decrease in higher dose
- Rinne (2010, ph2 Bapi): decrease in treated group
- Salloway (2014, ph3 Bapi): increase only in placebo group

## Two Phase 3 Trials of Bapineuzumab in Mild-to-Moderate Alzheimer's Disease

Stephen Salloway, M.D., Reisa Sperling, M.D., Nick C. Fox, M.D., Kaj Blennow, M.D.,

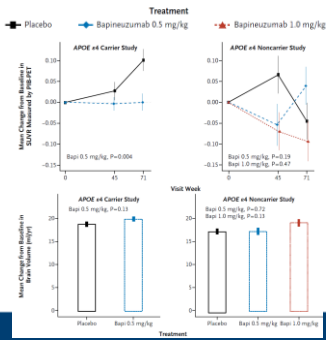

UNIVERSITY OF CAMBRIDGE

## Biomarkers: Imaging v CSF

### Imaging:

- Better validated for multi-site studies
- Measures pathology directly in target organ (brain)
- Can obtain both whole brain and spatial (regional) information
- Can obtain multi-modal data (structure, tau, amyloid, metabolism) though need > one scan
- People don't mind scans

### CSF:

- Cheaper (but how much in reality?)
- Can obtain tau and amyloid info in single step

**Imaging the clear winner by 5 points to 2!**

UNIVERSITY OF CAMBRIDGE

## Imaging biomarkers: Conclusions

|                 | Demonstrable sensitivity to change in untreated patients | Validated against underlying pathology | Available in UK in sufficient sites for use as outcome measure | Potentially useful outcome measure |
|-----------------|----------------------------------------------------------|----------------------------------------|----------------------------------------------------------------|------------------------------------|
| Structural MR   | Yes                                                      | Yes (mainly tau)                       | Yes                                                            | Yes                                |
| MR Spectroscopy | No                                                       | No                                     | Yes                                                            | No                                 |
| EEG             | No                                                       | No                                     | Yes                                                            | No                                 |
| Doppler         | No                                                       | No                                     | Yes                                                            | No                                 |
| Perfusion SPECT | Yes                                                      | Yes (mainly tau)                       | Yes                                                            | No (FDG PET better)                |
| FDG PET         | Yes                                                      | Yes (mainly tau)                       | Yes                                                            | Yes                                |
| Amyloid PET     | Yes (slowly)                                             | Yes (amyloid)                          | Yes                                                            | Yes                                |
| Tau PET         | No (but only one study)                                  | Yes (tau)                              | Not yet (likely to change soon)                                | Not yet proven but highly likely   |

UNIVERSITY OF CAMBRIDGE

Thank you!

UNIVERSITY OF CAMBRIDGE

## Important factors associated with scan

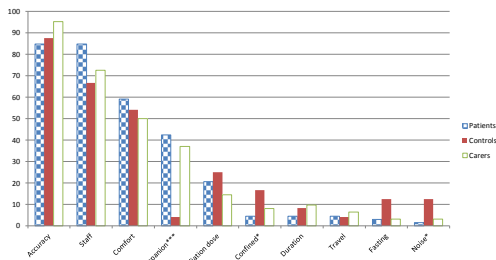

Overall 97% rated PET and 91% SPECT as worthwhile

UNIVERSITY OF CAMBRIDGE

Bamford et al, 2015

## Neuropsychiatric symptoms

Gill Livingston

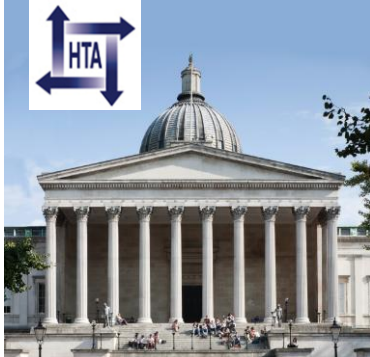

### What they are

- abnormal mood,
- disturbed behaviour,
- Disturbed thinking
- Disturbed perception

Also known as BPSD

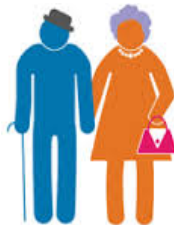

### Desirable characteristics

1. Valid and reliable in the population to be tested. This includes content validity -- measure covers neuropsychiatric and only neuropsychiatric items in
2. Frequency of use - valued or practical and how much they are likely to be used in practice.
3. Neuropsychiatric symptoms can be considered in terms of severity or frequency. - the symptoms may improve either by being of reduced frequency or reduced severity or one of these dimensions may improve while the other deteriorates .
4. Time taken should not be too long as the instrument would be part of a package
5. Ideally but not essentially the Minimally Clinically Important difference should have been calculated
6. Ideally translated into different languages

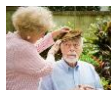

10 minutes

- What they are
- Should they be core
- Desirable characteristics
- Potential measures
- Frequency of use and time taken
- Recommendations and why

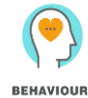

### Should they be core

NO

People with mild to moderate dementia may have

- No or no clinically significant neuropsychiatric symptoms
- Therefore no potential for these to improve
  - 78% newly diagnosed patients with AD neuropsychiatric symptoms
  - 59% clinically significant symptoms

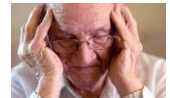

### Potential measures

1. The Neuropsychiatric Inventory(NPI),
2. Brief Psychiatric rating Scale (BPRS),
3. Alzheimer's Disease Assessment Scale - Non Cognitive Scale (ADAS-non-cog) ,
4. CERAD Behavioural rating scale for dementia,
5. The Revised Memory and Behavior Problems checklist,
6. Dysfunctional Behavior Rating Instrument
7. BEHAVE-AD
8. Nurses Observation Scale for Geriatric Patients
9. Plutchik Geriatric Rating Scale.

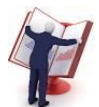

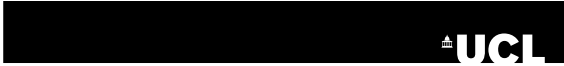

|                                                 | Number of studies | Number published | Number ongoing | Number of participants | Time taken    |
|-------------------------------------------------|-------------------|------------------|----------------|------------------------|---------------|
| NPI                                             | 39                | 31               | 8              | 11613                  | 10-20 minutes |
| ADAS-nonog                                      | 7                 | 7                | 0              | 778                    | 20-25 minutes |
| BPRS                                            | 3                 | 3                | 0              | 190                    | 20 minutes    |
| Nurses Observation Scale for Geriatric Patients | 2                 | 2                | 0              | 2109                   | 3-5 minutes   |
| CERAD Behavioural rating scale for dementia     | 1                 | 1                | 0              | 486                    | 20-30 minutes |
| BEHAVE-AD                                       | 1                 | 1                | 0              | 425                    | 20 minutes    |
| Dysfunctional Behavior Rating Instrument (DBRI) | 1                 | 1                | 0              | 406                    | 20 minutes    |
| Plutchik Geriatric Rating Scale                 | 1                 | 1                | 0              | 178                    | 5-10 minutes  |
| Revised memory and behavior problems checklist. | 1                 | 1                | 0              | 170                    | 10 minutes    |

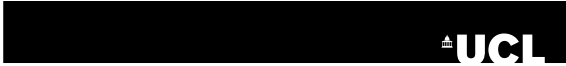

### What's in

NPI- valid, reliable, Frequency and severity  
 Frequent use. MCID =8  
 Only severity  
 BEHAVE AD  
 ADAS non-cog

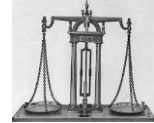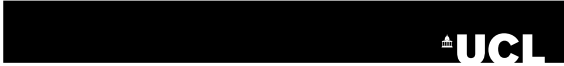

### What's out

The rest

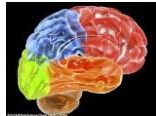

August, 2014

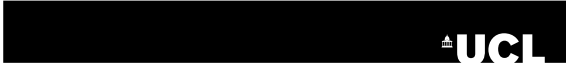

### Recommendations

Neuropsychiatric Inventory

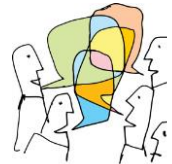

### What do you think?

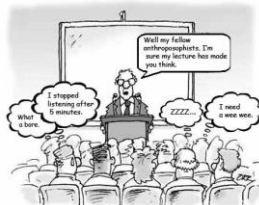

## Quality of life as a core outcome in dementia

SUBE BANERJEE

PROFESSOR OF DEMENTIA  
CENTRE FOR DEMENTIA STUDIES  
BRIGHTON AND SUSSEX MEDICAL SCHOOL

## Health related quality of life

...an individual's perception of their position in life...in relation to their goals, expectations, standards and concerns

– WHOQOL

...the impact of a perceived health state on [living] a subjectively fulfilling life

– Bullinger et al 1993

## Quality of life -- particularly important in dementia

- Dementias are more complex than simple disorders
  - coronary heart disease
  - diabetes
  - surgical care
- Non-linear and unpredictable process
- Multiple pathologies
- Link between symptoms and qol is not clear, simple or predictable
- Interventions are usually complex
  - need to avoid OSPD syndrome

## Case of including measures of quality of life in dementia

### Conceptual

- Does it measure what we are interested in?
- What really matters to people with dementia and their carers
- What really matters to clinicians
- The true goal of intervention
- Therefore relevant to policy makers and researchers

### Scientific

- Does it add any new and useful intelligence?
- Can you do it, does it work?
- More than just a combination of health assessments
- cognition and activity limitation are not very good proxies for quality of life

## DEMQOL-Proxy: Pearson correlation with clinical measures

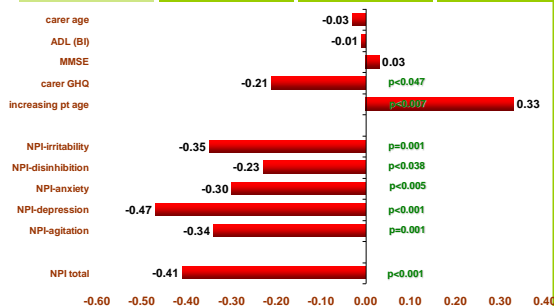

Banerjee et al (2006) JNNP

## DEMQOL-Proxy: Linear regression of clinical variables with DEMQOL-Proxy

|             | Beta coefficient | p-value |
|-------------|------------------|---------|
| NPI total   | 0.52             | <0.001  |
| Patient age | 0.32             | 0.016   |
| MMSE        | -0.16            | 0.281   |
| Carer GHQ   | 0.07             | 0.623   |
| ADL (BI)    | 0.02             | 0.924   |

Banerjee et al (2006) JNNP

## Two approaches to HRQL measurement

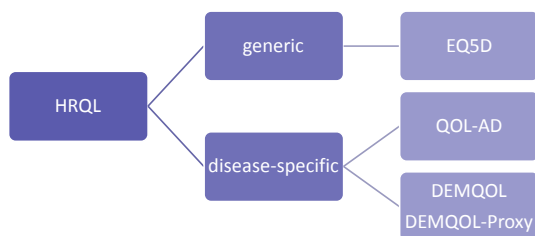

## EQ-5D

- Generic measure of HRQL
- Designed for use in all populations
- Questions about its validity in dementia (common with all generic HRQL instruments)
- Provides a simple descriptive profile and a single index value for health status
- In a health profile, respondents describe their current health state in 5 dimensions (EQ-5D descriptive system):
  - mobility,
  - self-care,
  - usual-activities (UA),
  - pain/discomfort (P/D), and
  - anxiety/depression (A/D)

## Scoring: the EQ-5D index

- Each of the 5 dimensions are classified as: none (1), moderate (2), or extreme (3)
- The patient's responses result in a 5-digit number
  - ❖ So "11123" indicates no problems with mobility, self-care, or usual activities but moderate problems with pain/discomfort and extreme problems with anxiety/depression)
- Overall, 243 health states are possible
- A preference-based index score can be calculated based on the EQ-5D health state combined with weightings derived from a sample of the general population. The EQ-5D index reflects the general population's valuation of the health state

## Disease-specific measures of HRQL

- Much excellent work in instrument development eg
  - PDS Dejong et al (1989)
  - DQOL Brod et al (1999)
  - QOL-AD Logsdon et al (1999)
  - ADRQL Black et al (2000)
  - QOLAS Selai et al (2001)
  - DEMQL Smith et al (2005)
- Evolving field with progressive refinement of methodology
- Development from measures of cognition or activity limitation to measures of HRQL

## QOL-AD

- 13-item measure patient's quality of life from both the patient and the caregiver
- Developed for individuals with dementia, based on patient, caregiver, and expert input, to maximize construct validity
- It uses simple and straightforward language and responses
- Rated on a four point scale, with 1 being poor and 4 being excellent. Total scores range from 13 to 52.
- Caregivers about 5 minutes, people with dementia 10-15 minutes to administer (same form)

## QOL-AD

1. First of all, how do you feel about your physical health? Would you say it's poor, fair, good, or excellent? Circle whichever word you think best describes your physical health right now.
2. How do you feel about your energy level? Do you think it is poor, fair, good, or excellent?
3. How has your mood been lately? Have your spirits been good, or have you been feeling down? Would you rate your mood as poor, fair, good, or excellent?
4. How about your living situation? How do you feel about the place you live now? Would you say it's poor, fair, good, or excellent?

| Quality of Life: AD<br>(Interview Version for the person with dementia)      |      |      |      |           |
|------------------------------------------------------------------------------|------|------|------|-----------|
| Interviewer administer according to standard instructions. Circle responses. |      |      |      |           |
| 1. Physical health.                                                          | Poor | Fair | Good | Excellent |
| 2. Energy.                                                                   | Poor | Fair | Good | Excellent |
| 3. Mood.                                                                     | Poor | Fair | Good | Excellent |
| 4. Living situation.                                                         | Poor | Fair | Good | Excellent |
| 5. Memory.                                                                   | Poor | Fair | Good | Excellent |
| 6. Family.                                                                   | Poor | Fair | Good | Excellent |
| 7. Marriage.                                                                 | Poor | Fair | Good | Excellent |
| 8. Friends.                                                                  | Poor | Fair | Good | Excellent |
| 9. Self as a whole.                                                          | Poor | Fair | Good | Excellent |
| 10. Ability to do chores around the house.                                   | Poor | Fair | Good | Excellent |
| 11. Ability to do things for fun.                                            | Poor | Fair | Good | Excellent |
| 12. Money.                                                                   | Poor | Fair | Good | Excellent |
| 13. Life as a whole.                                                         | Poor | Fair | Good | Excellent |

## DEMQOL

- Two interviewer administered self-report instruments
  - different items work in the two groups
  - measuring the same thing
- DEMQOL
  - 28 item self report for people with dementia
  - 5 to 30 minutes
  - Score 28 to 112
- DEMQOL-Proxy
  - 31 item carer report on qol of person with dementia
  - 5 to 10 minutes
  - Score 31 to 124
- Administration manuals for each

First I'm going to ask about **your feelings**. In the last week, have you felt.....

|                                                               |                                |                                      |                                   |                                     |
|---------------------------------------------------------------|--------------------------------|--------------------------------------|-----------------------------------|-------------------------------------|
| 1. cheerful? **                                               | <input type="checkbox"/> a lot | <input type="checkbox"/> quite a bit | <input type="checkbox"/> a little | <input type="checkbox"/> not at all |
| 2. worried or anxious?                                        | <input type="checkbox"/> a lot | <input type="checkbox"/> quite a bit | <input type="checkbox"/> a little | <input type="checkbox"/> not at all |
| 3. that you are enjoying life? **                             | <input type="checkbox"/> a lot | <input type="checkbox"/> quite a bit | <input type="checkbox"/> a little | <input type="checkbox"/> not at all |
| 4. frustrated?                                                | <input type="checkbox"/> a lot | <input type="checkbox"/> quite a bit | <input type="checkbox"/> a little | <input type="checkbox"/> not at all |
| 5. confident? **                                              | <input type="checkbox"/> a lot | <input type="checkbox"/> quite a bit | <input type="checkbox"/> a little | <input type="checkbox"/> not at all |
| 6. full of energy? **                                         | <input type="checkbox"/> a lot | <input type="checkbox"/> quite a bit | <input type="checkbox"/> a little | <input type="checkbox"/> not at all |
| 7. sad?                                                       | <input type="checkbox"/> a lot | <input type="checkbox"/> quite a bit | <input type="checkbox"/> a little | <input type="checkbox"/> not at all |
| 8. lonely?                                                    | <input type="checkbox"/> a lot | <input type="checkbox"/> quite a bit | <input type="checkbox"/> a little | <input type="checkbox"/> not at all |
| 9. distressed?                                                | <input type="checkbox"/> a lot | <input type="checkbox"/> quite a bit | <input type="checkbox"/> a little | <input type="checkbox"/> not at all |
| 10. lively? **                                                | <input type="checkbox"/> a lot | <input type="checkbox"/> quite a bit | <input type="checkbox"/> a little | <input type="checkbox"/> not at all |
| 11. irritable?                                                | <input type="checkbox"/> a lot | <input type="checkbox"/> quite a bit | <input type="checkbox"/> a little | <input type="checkbox"/> not at all |
| 12. fed-up?                                                   | <input type="checkbox"/> a lot | <input type="checkbox"/> quite a bit | <input type="checkbox"/> a little | <input type="checkbox"/> not at all |
| 13. that there are things that you wanted to do but couldn't? | <input type="checkbox"/> a lot | <input type="checkbox"/> quite a bit | <input type="checkbox"/> a little | <input type="checkbox"/> not at all |

Next, I'm going to ask you about **your memory**. In the last week, how worried have you been about.....

|                                               |                                |                                      |                                   |                                     |
|-----------------------------------------------|--------------------------------|--------------------------------------|-----------------------------------|-------------------------------------|
| 14. forgetting things that happened recently? | <input type="checkbox"/> a lot | <input type="checkbox"/> quite a bit | <input type="checkbox"/> a little | <input type="checkbox"/> not at all |
| 15. forgetting who people are?                | <input type="checkbox"/> a lot | <input type="checkbox"/> quite a bit | <input type="checkbox"/> a little | <input type="checkbox"/> not at all |
| 16. forgetting what day it is?                | <input type="checkbox"/> a lot | <input type="checkbox"/> quite a bit | <input type="checkbox"/> a little | <input type="checkbox"/> not at all |

Study ID

## DEMQOL

Instructions: Read each of the following questions (in bold) verbatim and show the respondent the response card.

I would like to ask you about your life. There are no right or wrong answers. Just give the answer that best describes how you have felt in the last week. Don't worry if some questions appear not to apply to you. We have to ask the same questions of everybody.

Before we start we'll do a practise question; that's one that doesn't count. (Show the response card and ask respondent to say or point to the answer.). In the last week, how much have you enjoyed watching television?

a lot                      quite a bit                      a little                      not at all

Follow up with a prompt question: Why is that? or Tell me a bit more about that.

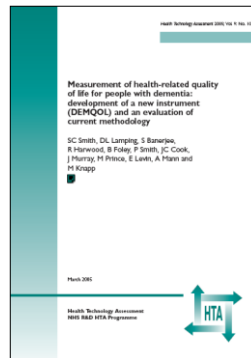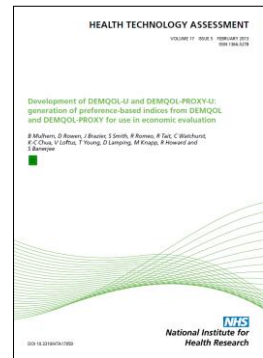

Smith et al (2005); Mulhern et al (2013). Health Tech Ass

## Summary of psychometric properties of instruments by gold standard criteria

|                               | PDS | Pleasant Events Schedule – AD | QOL-AD  |       | DEMQOL  |       |
|-------------------------------|-----|-------------------------------|---------|-------|---------|-------|
|                               |     |                               | Patient | Proxy | Patient | Proxy |
| Conceptual model              | 0   | +                             | ++      | 0     | +++     | +++   |
| Acceptability                 | 0   | 0                             | ++      | ++    | ++      | ++    |
| Reliability                   |     |                               |         |       |         |       |
| Internal consistency          | 0   | 0                             | +++     | +++   | +++     | +++   |
| Test-retest                   | +++ | 0                             | +++     | ++    | +++     | +++   |
| Inter-rater reliability       | 0   | 0                             | NA      | 0     | ++      | +     |
| Validity                      |     |                               |         |       |         |       |
| Content                       | +   | 0                             | +++     | +++   | +++     | +++   |
| Criterion-related             | 0   | 0                             | 0       | 0     | ++      | ++    |
| Construct                     |     |                               |         |       |         |       |
| Convergent validity           | 0   | +                             | +++     | +++   | +++     | +++   |
| Discriminant validity         | 0   | 0                             | 0       | 0     | ++      | ++    |
| Known groups differences      | +   | 0                             | +++     | 0     | +++     | +++   |
| Experimental intervention     | 0   | 0                             | ++      | ++    | ++      | ++    |
| Factor analysis               | 0   | 0                             | +       | +     | ++      | ++    |
| Responsiveness                | 0   | 0                             | +       | +     | +       | +     |
| Respondent burden             | 0   | ++                            | +++     | +++   | +++     | +++   |
| Cultural/language adaptations | 0   | 0                             | ++      | ++    | ++      | ++    |
| Economic evaluation           | 0   | 0                             | 0       | 0     | +++     | +++   |
| Health state classification   | 0   | 0                             | 0       | 0     | +++     | +++   |
| Preference-based measures     | 0   | 0                             | 0       | 0     | +++     | +++   |
| Population values             | 0   | 0                             | 0       | 0     | +++     | +++   |

0, no evidence or not tested; +, some limited evidence; ++, some good evidence, but some aspects do not meet criteria or some aspects not tested/reported; +++, good evidence; NA, not applicable.

## Data from systematic review on use

|                     | EQ5D | QOL-AD | DEMQOL |
|---------------------|------|--------|--------|
| Number studies      | 5    | 9      | 4      |
| Studies published   | 4    | 7      | 1      |
| Studies ongoing     | 1    | 2      | 3      |
| Number participants | 4084 | 4893   | 399    |

## Choices

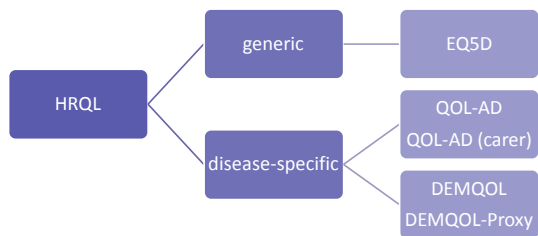

Supplement: pone.0179521.s003.pdf [file pone.0179521.s003.pdf]
